# Supplementary material
Source: PubMed Central journal article supplement (PMC3760745)
Supplement: chest_144_3_981_ds01.pdf [file chest_144_3_981_ds01.pdf]

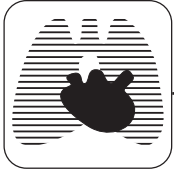

### Longitudinal Trends in Health-Related Quality of Life in Adults With Cystic Fibrosis

*Edward J. Dill, PhD; Ree Dawson, PhD; Deborah E. Sellers, PhD;  
Walter M. Robinson, MD, MPH; and Gregory S. Sawicki, MD, MPH*

#### E-APPENDIX 1

At each site, the project title is “Project on Adult Care in Cystic Fibrosis”

1. University of Colorado and National Jewish Medical and Research Center (COMIRB Protocol 04-0472)
2. University of Washington Human Subjects Review Committee G ( Protocol 04-1520-G 01)
3. Children’s Hospital of Boston Committee on Clinical Investigation (Protocol 04-001-007)
4. University of Utah Institutional Review Board (Protocol 000112984)
5. The University of Vermont Committees on Human Research (Protocol 04-327)
6. Albany Medical Center Committee on Research Involving Human Subjects (no assigned protocol number)
7. Northwestern University Institutional Review Board(Protocol 0273-015)
8. Stanford University Panel on Medical Human Subjects(Protocol 12684)
9. St. Vincent’s Catholic Medical Centers Integrated Scientific and Ethical Review Board (Protocol PA-00-127)
9. University of North Carolina Chapel Hill, The Committee on the Protection of the Rights of Human Subjects (Protocol 04-PUL/MED-245)
10. Education Development Center, Inc (Protocol 5352)
